# Supplementary material
Source: Springer Nature journal article supplement (https://www.springermedizin.de/resource/supplementary/12913_2013_3138_MOESM1_ESM.pdf/9532476)
Supplement: MOESM1 [file 9532476]

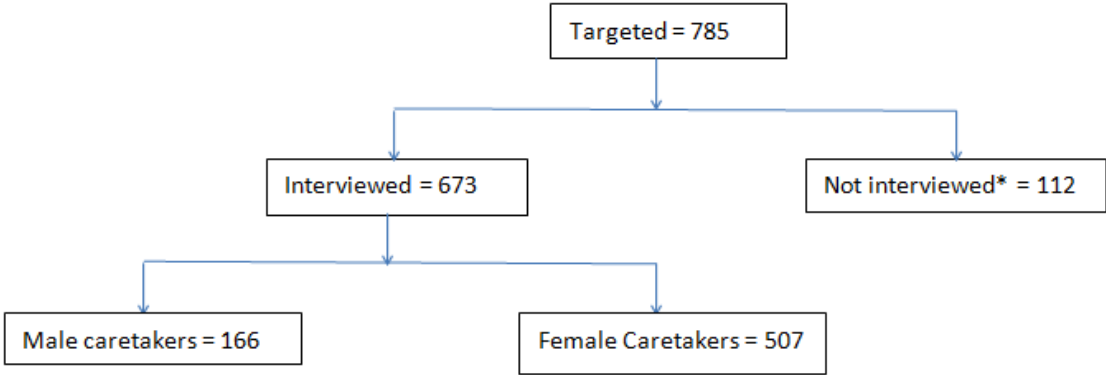

*\* This category included households in which members were not available for the survey, refused, or did not meet eligibility requirements*
